# Supplementary material
Source: Springer Nature journal article supplement (https://www.springermedizin.de/resource/supplementary/13045_2013_355_MOESM11_ESM.pdf/9661200)

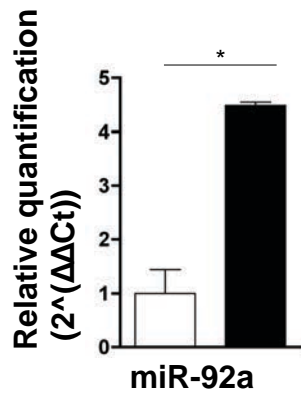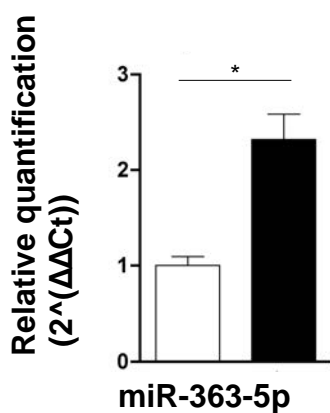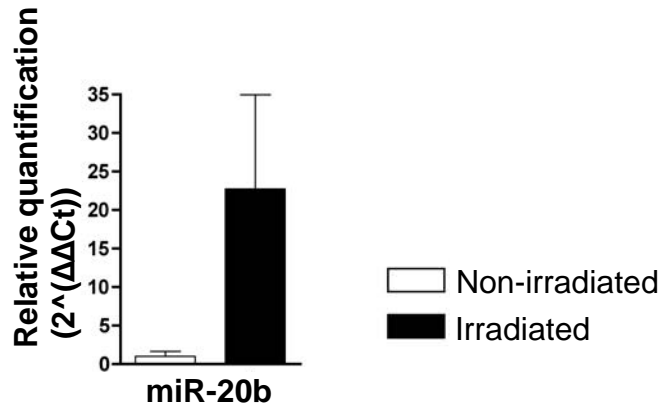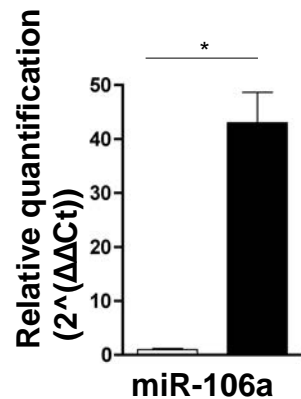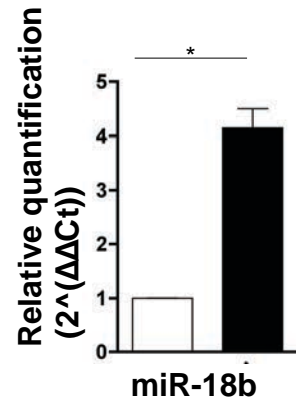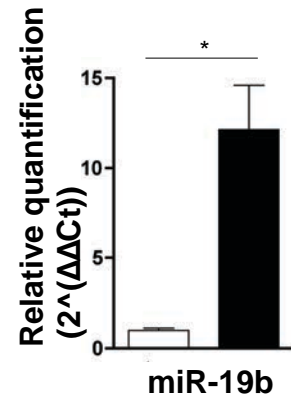

Supplement: MOESM11 [file 9661200]
